# Supplementary material
Source: PubMed Central journal article supplement (PMC4941926)

## Supplemental Data

### The Nuclear Orphan Receptor NR2F6

### Suppresses Lymphocyte Activation

### and T Helper 17-Dependent Autoimmunity

Natascha Hermann-Kleiter, Thomas Gruber, Christina Lutz-Nicoladoni, Nikolaus Thuille, Friedrich Fresser, Verena Labi, Natalia Schiefermeier, Marei Warnecke, Lukas Huber, Andreas Villunger, Gregor Eichele, Sandra Kaminski, and Gottfried Baier

#### Supplemental Experimental Procedures

##### *Analysis of proliferation responses*

Antibody- and alloantigen-induced proliferation was measured after 64 hrs by [<sup>3</sup>H]thymidine incorporation during the last 16 hrs using a Matrix 96 direct  $\beta$  counter system. CD4<sup>+</sup> and CD8<sup>+</sup> T cells were negatively selected by magnetic cell sorting (Miltenyi Biotec). For anti-CD3 stimulations, T cells ( $5 \times 10^5$ ) in 200  $\mu$ l proliferation medium (RPMI supplemented with 10% FCS, 2 mM L-glutamine and 50 units ml<sup>-1</sup> penicillin/streptomycin) were added to plates precoated with anti-CD3 antibody (clone 2C11, 10  $\mu$ g ml<sup>-1</sup>) in duplicates. Where indicated soluble anti-CD28 (1  $\mu$ g ml<sup>-1</sup>; BD Bioscience) was added. Splenic B cells were purified by depletion of non-B cells on MACS columns (Miltenyi Biotec) with anti-CD43 Abs coupled to magnetic beads (Miltenyi Biotec). B cells were stimulated with 1.2 or 2.4  $\mu$ g ml<sup>-1</sup> goat anti-mouse IgM F(ab')<sub>2</sub> (Dianova) in combination with 25 U ml<sup>-1</sup> recombinant mouse IL-4 (Roche).

##### *Flow cytometry*

Single-cell suspensions of spleen, lymph node, thymus or bone marrow were prepared and incubated for 30 min on ice in staining buffer (PBS containing 2% FCS and 0.2% NaN<sub>3</sub>) together with FITC, PE, APC or biotinylated antibody conjugates. Surface marker expression was analyzed using a FACS Calibur cytometer (BD Biosciences) together with CellQuestPro

software. Abs against murine CD3, CD4, and CD8 were obtained from Caltag Laboratories; CD28, CD69, CD44, CD25, CD62L, ICOS, TCR, V $\beta$ 8, CD19, B220, IgM, IgD, CD43, CD5, CD21, CD23, Ger1, Mac1, Thy1 and CD19 were obtained from BD Pharmingen, FOXP3, B220 and CD21/CD35 from eBioscience. Streptavidin-RPE (Dako) was used to stain biotinylated mAbs.

#### ***Detection of autoantibodies in mouse serum on rat liver sections and with ELISA***

Slides precoated with rat liver sections were used to evaluate the presence of ANA in mouse blood serum using an Alexa Fluor 488 goat anti-mouse IgG1 antibody (Molecular Probes). Measurement of autoantibodies against double-stranded DNA was performed by ELISA ( $\alpha$ -Diagnostics). Results were expressed as absorbance at 450 nM.

#### ***Determination of serum immunoglobulin (Ig) levels***

The concentration of different Ig subclasses in mouse sera was analyzed using isotype-specific antibodies using ELISA quantification kits for IgG<sub>a</sub>, IgG<sub>1</sub>, IgG, IgE and IgM obtained from Bethyl.

#### ***Apoptosis detection***

Total splenocytes were used to generate activated T cell blasts using Con A ( $2 \mu\text{g ml}^{-1}$ ) for 48 hrs, followed by IL-2 stimulation ( $100 \text{ U ml}^{-1}$ ) for additional 72 hrs. After 5 days, activated T cell blasts were washed twice; viable cells were enriched by Lympholyte<sup>TM</sup> (Cedarlane) gradient centrifugation (viability >90%), and incubated in IMEM medium (10% FCS, 2 mM L-Glutamin and  $50 \text{ U ml}^{-1}$  Pen/Strep). Apoptosis sensitivity was challenged by different concentrations of anti-CD3 cross-linking Abs (clone 2C11) or cross-linked recombinant FasL (FasL  $100 \text{ ng ml}^{-1}$  & enhancer for FasL (at  $1 \mu\text{g ml}^{-1}$ ) to trigger activation-induced cell death. 8 hrs after apoptosis induction cells were harvested and then stained with annexin V-FITC

(Molecular Probes), anti CD4-PE and anti CD8-APC (Caltag). The percentage of apoptotic cells in each T cell subset was determined by FACS analysis using FACS Calibur (BD) and CellQuestPro software. Splenic B cells from *Nr2f6*<sup>-/-</sup> and *Nr2f6*<sup>+/+</sup> mice were purified in a FACSVantage sorter by negative cell sorting using following monoclonal antibodies: MI/70, anti-Mac-1 (eBioscience); Ter119, antierythroid cell surface marker (BD); T24.31.2, anti-Thy-1. B cells were cultured at an initial concentration of  $5 \times 10^5$  cells ml<sup>-1</sup> in proliferation medium (RPMI supplemented with 10% FCS, 2 mM L-glutamine and 50 units ml<sup>-1</sup> penicillin/streptomycin). For the induction of cell death anti-IgM F(ab) fragments (Jackson Immuno Research) were used. The percentages of viable cells in culture were determined by staining cell suspensions with propidium iodide plus annexin V-FITC (Molecular Probes).

### Abbreviations

ANA anti nuclear antibody; AP-1 activating protein-1; CK1 casein kinase 1; COUP-TF chicken ovalbumin upstream promoter transcription factor; dsDNA double stranded DNA; EAE experimental autoimmune encephalomyelitis; EMSA electrophoretic mobility shift assay; FACS fluorescence-activated cell sorter; FOXP3 forkhead box P3; IFN- $\gamma$  interferon  $\gamma$ ; IL-2 interleukin-2; IL-17 interleukin-17; LT $\alpha$  lymphoid tissue inducer cells; i.p. intra-peritoneal; i.v. intra-venous; LXR liver x receptor; MOG Myelin oligodendrocyte protein; NF-AT nuclear factor of activated T cells; NF- $\kappa$ B nuclear factor of  $\kappa$ B; NR nuclear receptor; NR2F6 nuclear receptor subfamily 2, group F, member 6; Nur77/NR4A1 nuclear receptor 77 subfamily 4, group A, member 1; OHT4-hydroxytamoxifen; PKB protein kinase B; PKC protein kinase C; PPAR peroxisome proliferator-activated receptor; RAR retinoic acid receptor; ROR $\gamma$ /NR1F3 retinoid-related orphan receptor  $\gamma$ /nuclear receptor subfamily 1, group F, member 3; RXR retinoid x receptor; SEB super antigen staphylococcal enterotoxin B; SEE super antigen staphylococcal enterotoxin E; TCR T cell receptor; and Th17 T helper cell subset producing IL-17.

**Supplemental figure legends:**

**Figure S1: NR2F6 domain structure and mRNA levels in activated T cells**

(A) Schematic of NR2F6 domain structure modified from (Giguere, 1999) showing the position of the putative PKC phosphorylation site at S83. (B) In mouse CD3<sup>+</sup> T cells, *Nr2f6* mRNA levels decreased after 4 h of stimulation with solid phase CD3 antibodies alone or in combination with co-stimulatory CD28. Mean of 3 independent experiments are shown and error bars represent standard error. Data were normalized to GAPDH.

**Figure S2: NR2F6 interacts with PKC $\alpha$  and PKC $\theta$  and binds to its established TGACCT direct-repeat DNA motif in EMSA analysis**

(A) Consistent with its identification as a PKC substrate, endogenous PKC $\alpha$  and PKC $\theta$  (but not PKB) bound to recombinant NR2F6 in GST-pull down assays. Such physical interaction occurred independently of T cell stimulation (CD3 ligation or PDBu treatment) and phosphorylation (Ser-83) status on NR2F6. One representative experiment out of three is shown. (B) EMSA analysis employing transient Jurkat transfections has confirmed that only a slight shift can be observed but supershifting mAb (directed against an epitope with amino acids 13-44 of NR2F6) reproducibly induced a conformational switch and/or increased avidity that stabilizes NR2F6 DNA-binding. We did not see this stabilization effect with non-specific antibody controls. The free probe does not shift with this NR2F6 mAb, as demonstrated in the GFP control transfections.

**Figure S3: Schematic cartoon of conditionally activated NR2F6-ER**, consisting of the NR2F6 DNA-binding domain (DBD) mutant fused to a mutated estrogen receptor ligand-binding domain (ER<sub>mut</sub>-LBD). Exposure to OHT, the selective agonist of ER<sub>mut</sub>-LBD within NR2F6-ER, strongly induced nuclear translocation of recombinant NR2F6-ER fusion mutant protein (not shown).

**Figure S4: *Nr2f6*<sup>-/-</sup> immature thymocytes are as sensitivity to negative selection as *Nr2f6*<sup>+/+</sup> controls**

Negative selection in double positive thymocytes (CD4<sup>+</sup>/CD8<sup>+</sup>) was induced by anti-CD3 antibody i.p. injection in *Nr2f6*<sup>-/-</sup> and *Nr2f6*<sup>+/+</sup> controls. FACS analysis after 24 h revealed no difference in thymocyte depletion between the genotypes (*Nr2f6*<sup>+/+</sup> n=3; *Nr2f6*<sup>-/-</sup> n=3). Means are shown; error bars represent standard error.

**Figure S5: *Nr2f6*<sup>-/-</sup> B cell development in the bone marrow is normal**

Cells derived from *Nr2f6*<sup>-/-</sup> and *Nr2f6*<sup>+/+</sup> controls were stained for pro-B cells (B220<sup>+</sup>CD43<sup>+</sup>), pre-B cells (B220<sup>+</sup>CD43<sup>-</sup>IgM<sup>-</sup>), immature B cells (IgD<sup>-</sup>IgM<sup>+</sup>) and mature B cells (IgD<sup>+</sup>IgM<sup>+</sup>) (*Nr2f6*<sup>+/+</sup> n=3; *Nr2f6*<sup>-/-</sup> n=3). Means are shown; error bars represent standard error.

**Figure S6: Splenomegaly in *Nr2f6*<sup>-/-</sup> mice**

12 month-old *Nr2f6*<sup>-/-</sup> mice displayed enlarged spleens with increased lymphocyte numbers in *Nr2f6*<sup>-/-</sup> mice.

**Figure S7: Serum immunoglobulin levels of aged *Nr2f6*<sup>-/-</sup> mice**

Serum immunoglobulin levels of IgM, IgE, IgG2a and IgG2b of young (6-10 weeks) and old (>12 month) *Nr2f6*<sup>-/-</sup> mice were determined via ELISA. Means are shown; error bars represent standard error.

**Figure S8: Reduced apoptosis response in *Nr2f6*<sup>-/-</sup> CD4<sup>+</sup> T and B cells**

(A) CD4<sup>+</sup> T cells of *Nr2f6*<sup>-/-</sup> have a lower apoptosis rate when induced with different concentrations of anti-CD3. (B) In contrast, apoptotic rates of CD8<sup>+</sup> T cells were comparable to wild-type controls. (C) Spontaneous and (D) IgM-induced B cell apoptosis rate is also significantly lower when compared to wild-type controls. (A) Factorial split plot with the factors “genotypes”, with the four CD3 concentrations of each cell assembly of each animal revealed a significant difference  $p=0.025$  (*Nr2f6*<sup>+/+</sup> n=6; *Nr2f6*<sup>-/-</sup> n=6), that could not be found in the CD8<sup>+</sup> T cells. *Nr2f6*<sup>-/-</sup> B cells *Nr2f6*<sup>+/+</sup> n=6; *Nr2f6*<sup>-/-</sup> n=6 have a lower spontaneous (C)  $p=0.036$ , (D) and induced apoptosis rate  $p=0.012$ . Means are shown; error bars represent standard error.

**Figure S9: *Nr2f6*<sup>-/-</sup> mice have hyper-reactive T lymphocytes**

(A&B) Proliferative responses of *Nr2f6*<sup>+/+</sup> (n =3) and *Nr2f6*<sup>-/-</sup> (n =3) CD4<sup>+</sup> and CD8<sup>+</sup> T cells were higher in the *Nr2f6*<sup>-/-</sup> CD4<sup>+</sup> (although not on a significant level) but not in the CD8<sup>+</sup> subset. (C) IFN- $\gamma$  cytokine secretion response of *Nr2f6*<sup>-/-</sup> CD8<sup>+</sup> T cells was upregulated - although not on a significant level - upon the indicated stimuli measured by Bioplex technology. Data show the mean of three independent experiments done in duplicates; error bars represent standard error.

**Figure S10: *Nr2f6*<sup>-/-</sup> mice have hyper-reactive B cells**

Purified *Nr2f6*<sup>-/-</sup> splenic B cells stimulated with anti-IgM antibodies (1,2  $\mu\text{g/ml}$ ) plus IL-4 (25 U/ml) for 72 h showed a significant higher proliferation response than *Nr2f6*<sup>+/+</sup> controls. (Unpaired t-test: *Nr2f6*<sup>+/+</sup> n=3; *Nr2f6*<sup>-/-</sup> n=3;  $p=0.013$ ). Data show the mean of three independent experiments; error bars represent standard error.

**Figure S11: NR2F6 overexpression suppresses IL-2 secretion in CD4<sup>+</sup> T cells**

(A) NR2F6 wild-type plasmid transfections of CD4<sup>+</sup> T cells suppresses IL-2 secretion of CD3/CD28 stimulated cells after 24 h. One representative experiment out of two is shown.

(B) qRT-PCR of *Nr2f6* was used to control the transfection rate and data were normalized to GAPDH.

**Figure S12: siRNA-mediated knock down abrogates target *Nr2f6* mRNA levels**

qRT-PCR analysis of *Nr2f6* mRNA level revealed that target *Nr2f6* mRNA expression was diminished by >90% in *Nr2f6* siRNA but not in the control siRNA bulk transfected CD4<sup>+</sup> T cells. One of two representative experiments is shown.

**Figure S13: CD3 and TCR-V $\beta$ 8 surface expression on *Nr2f6*<sup>-/-</sup> CD3<sup>+</sup> T cells**

(A) CD3 and (B) TCR-V $\beta$ 8 surface expression on T cells was comparable between *Nr2f6*<sup>+/+</sup> and *Nr2f6*<sup>-/-</sup> T cells, as shown by flow cytometry. One representative experiment out of three is shown ( $\pm$  SD).

**Figure S14: IL-17 secretion in Th17 wild-type and *Nr2f6*-deficient cells**

(A) Naïve CD4<sup>+</sup> T cells from *Nr2f6*<sup>+/+</sup> or *Nr2f6*<sup>-/-</sup> mice were differentiated under neutral (Medium) or stimulating (CD3 plus CD28) Th17 conditions for 4 days. IL-17 expressing cells were measured by intracellular staining after a 5 h PDBu plus Ionomycin pulse in the presence of Golgi-plug. One representative experiment out of three is shown. These single-cell level measurements of IL-17 expression in Th17 cells by flow cytometry confirmed data of secreted IL-17 cytokine levels obtained by BioPlex multi-analyte technology (Fig. 4G and S14B). (B) In the Th17 subset, NR2F6 function appeared specific to the effector/memory but not regulatory cells, since no effect of *Nr2f6* deficiency on IL-10 expression levels was observed. IL-10 secretion of the regulatory Th17 subsets was the same in wild-type (white

bars) and *Nr2f6*-deficient (black bars) Th17 cells. Th17 differentiation status was controlled by IL-2, IL-17 and IFN- $\gamma$  secretion responses. One representative experiment of two is shown.

**Figure S15: NF-AT translocation is unaltered by NR2F6**

NF-ATc translocation into the nucleus in unstimulated (-) and CD3 plus CD28 stimulated (+) (A) mouse wild-type and *Nr2f6*-deficient CD4<sup>+</sup> T cells as well as in (B) Jurkat cells transfected with NR2F6-ER plasmid (under OHT co-treatment) was neither changed between the different genotypes nor between different transfected Jurkat extracts. DNA polymerase was used as loading control. One representative experiment out of 3 is shown.

**Figure S16: Subsets in EAE-diseased mice did not differ between genotypes**

No significant difference was seen in *Nr2f6*<sup>-/-</sup> (black bars) T and B cell subsets derived from EAE-diseased mice when compared to *Nr2f6*<sup>+/+</sup> (white bars) controls. This includes the numbers and ratios of both Treg (FOXP3<sup>+</sup>) and Th17 (IL-23R<sup>+</sup>) T cell effector lineages; (*Nr2f6*<sup>+/+</sup> n=5; *Nr2f6*<sup>-/-</sup> n=5). Data show the mean, error bars represent standard error.



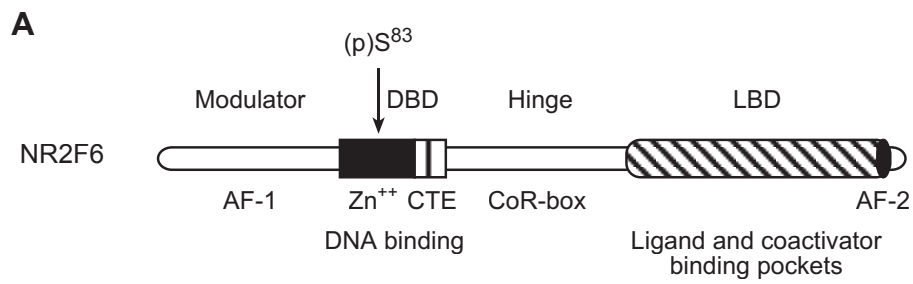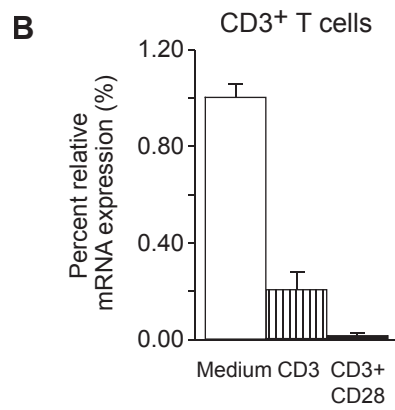



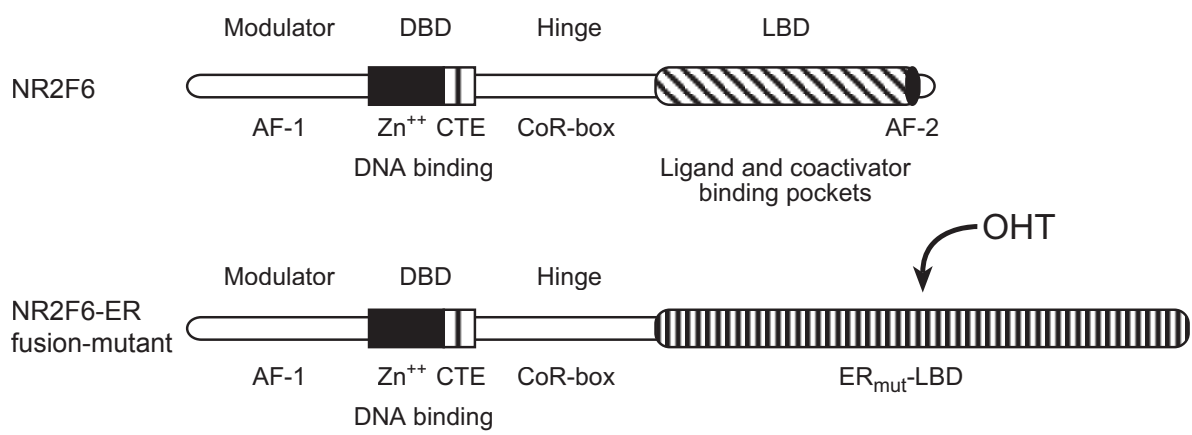

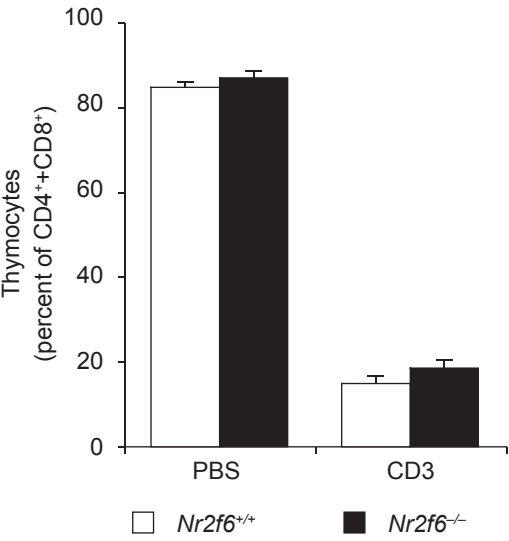

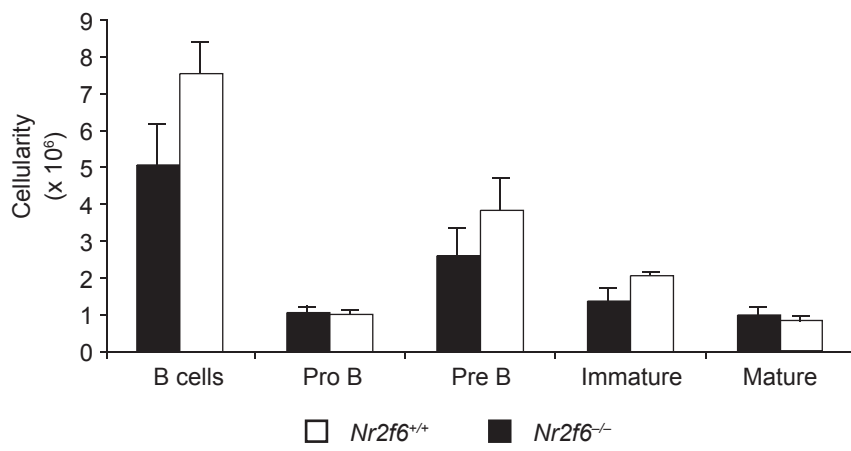

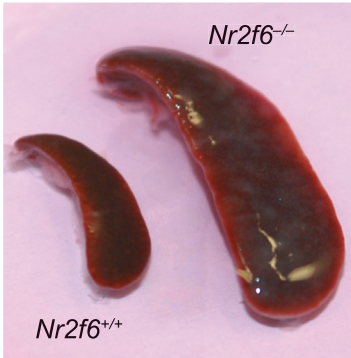

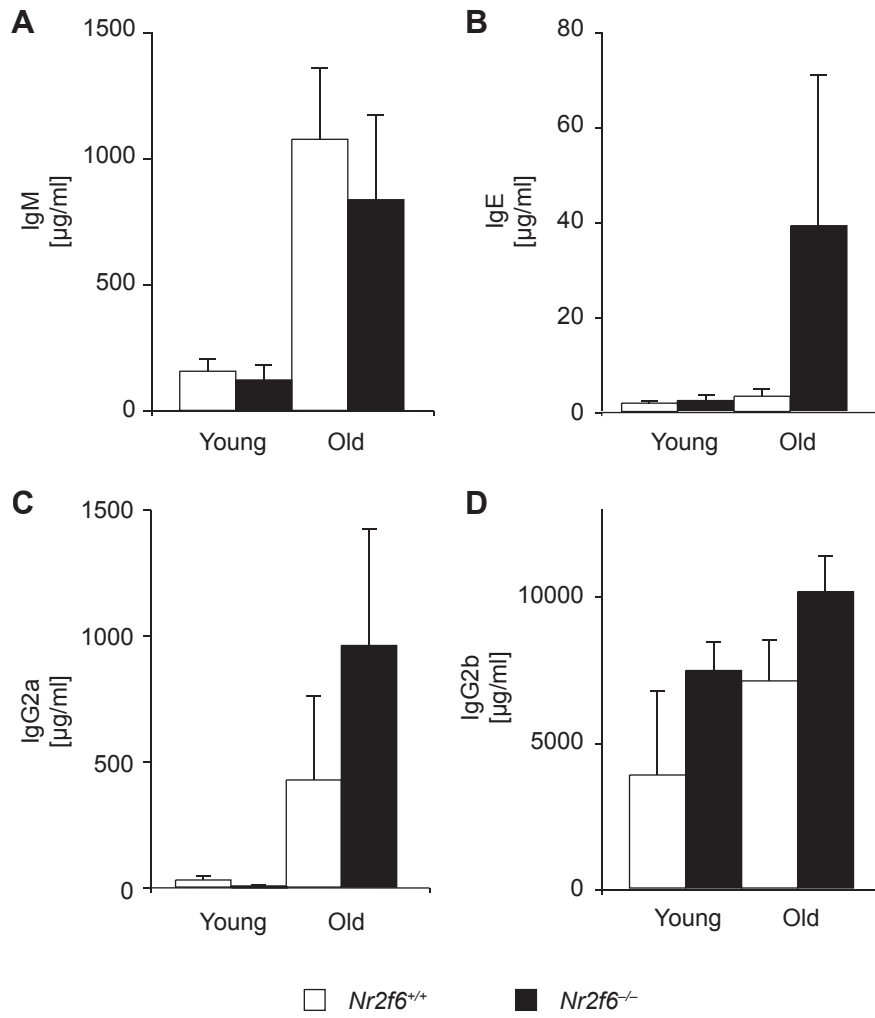

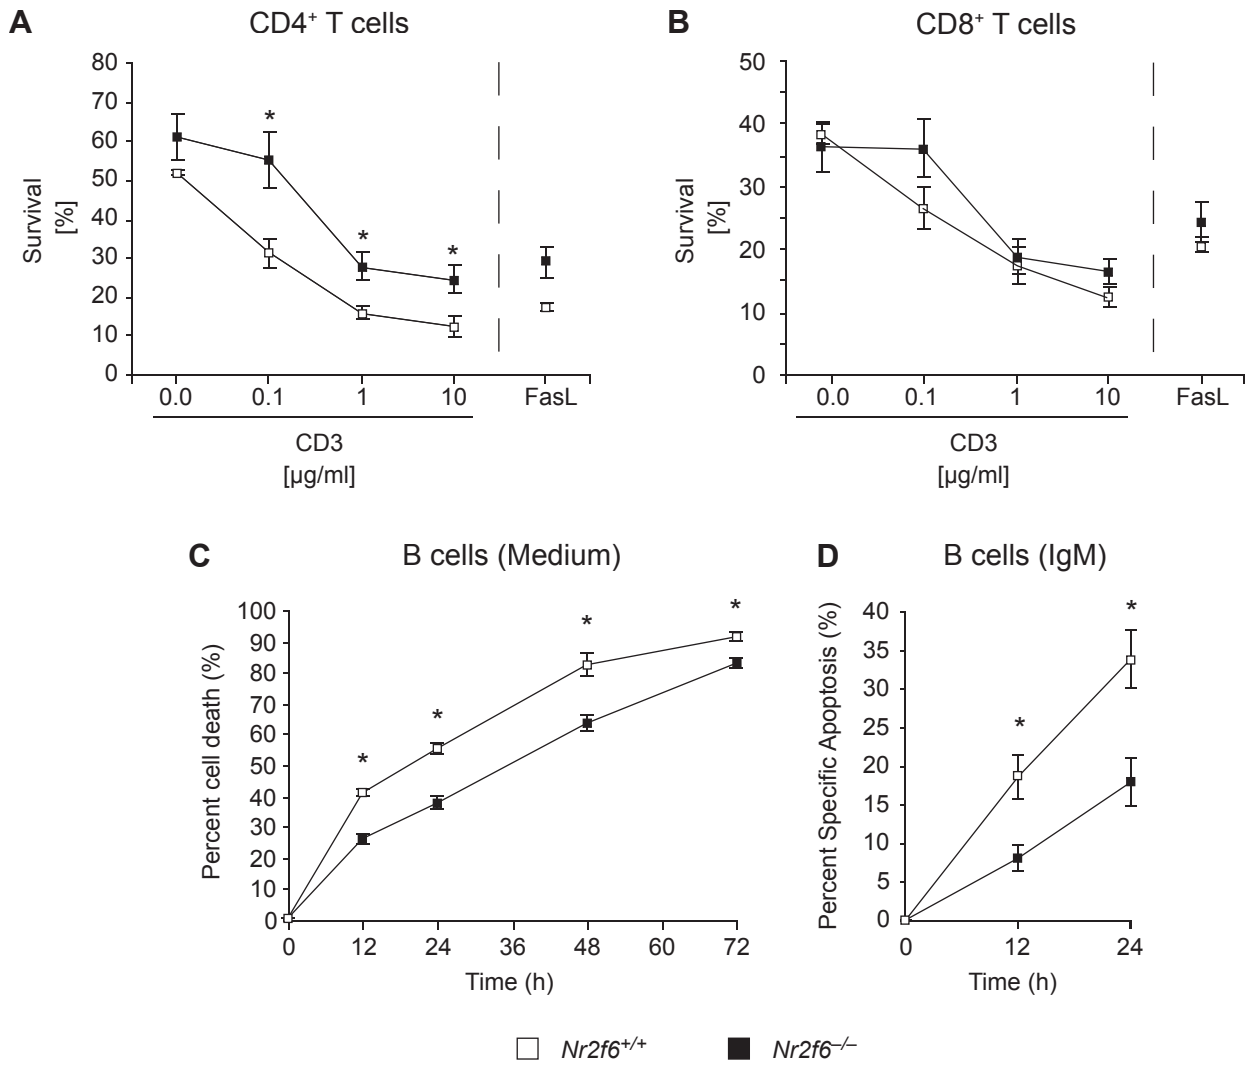



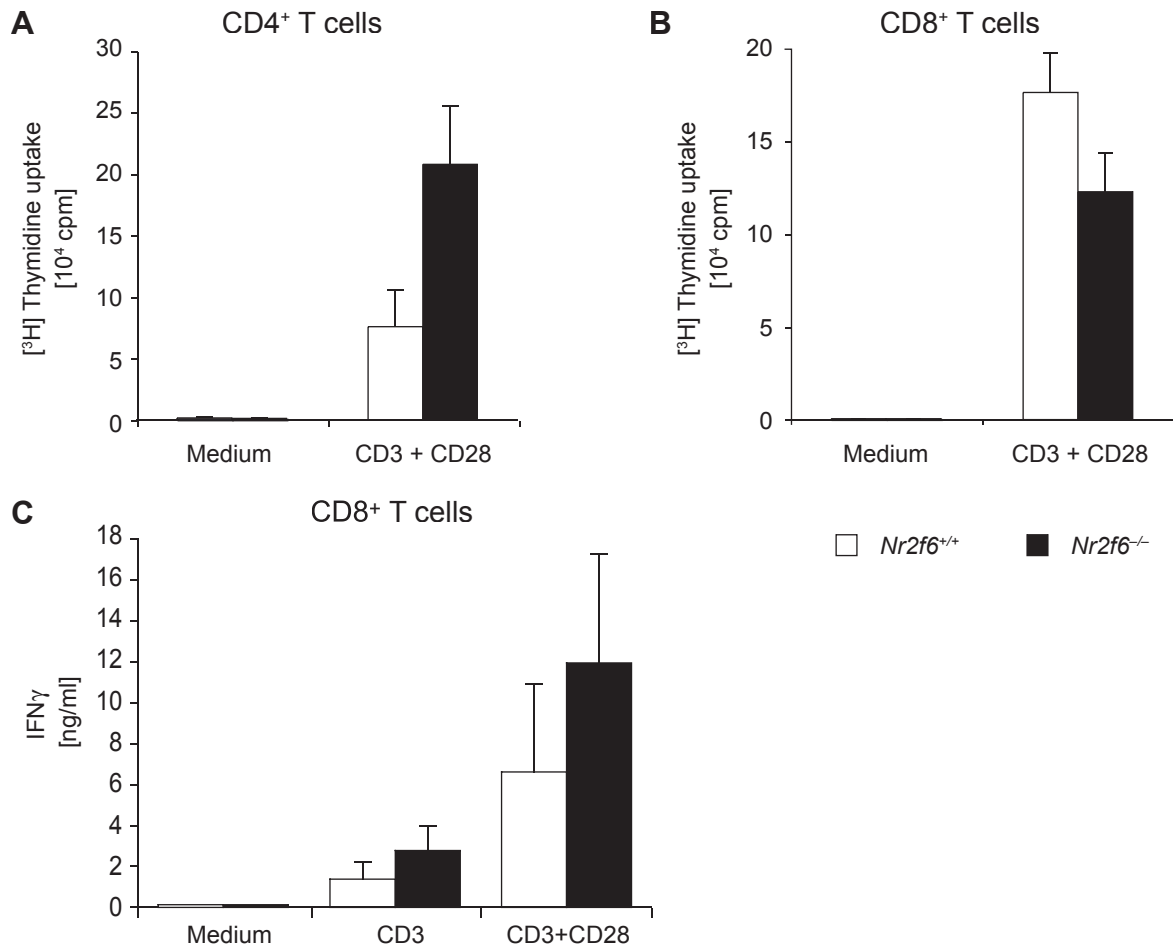

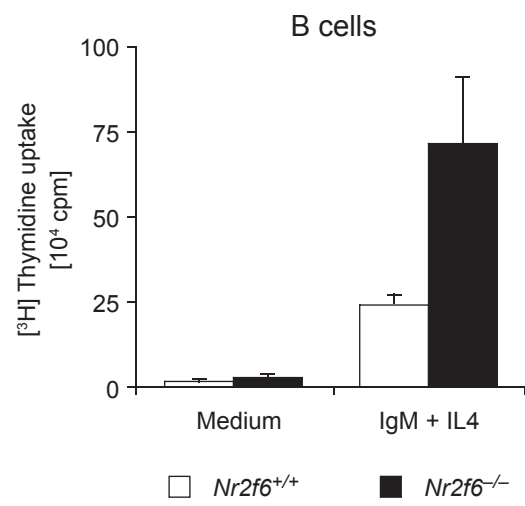

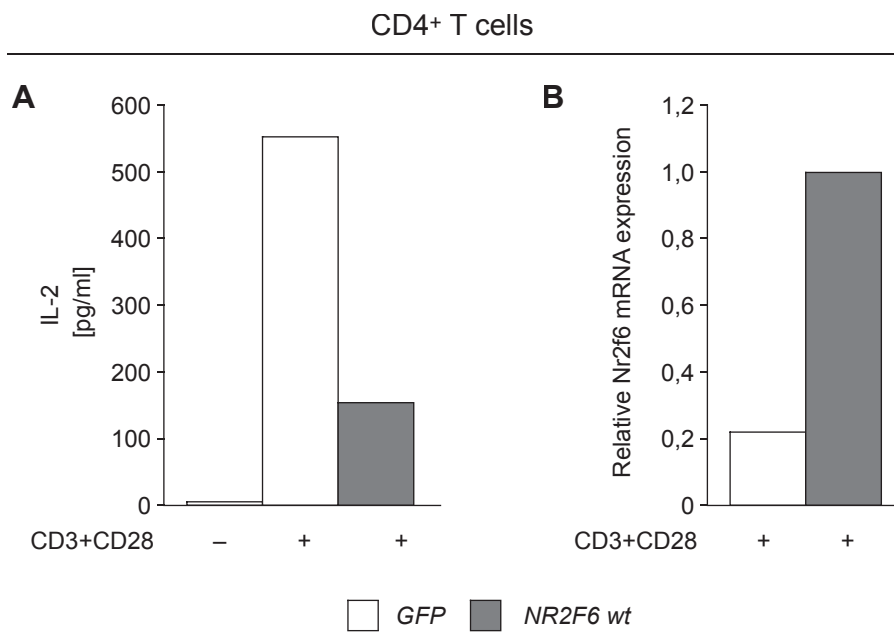

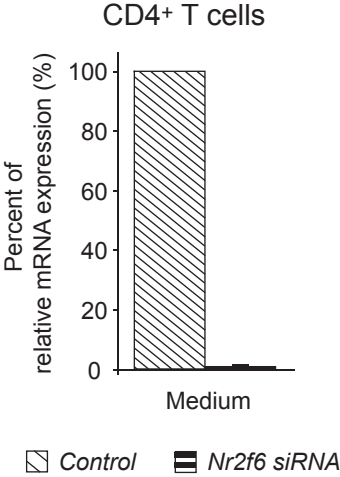

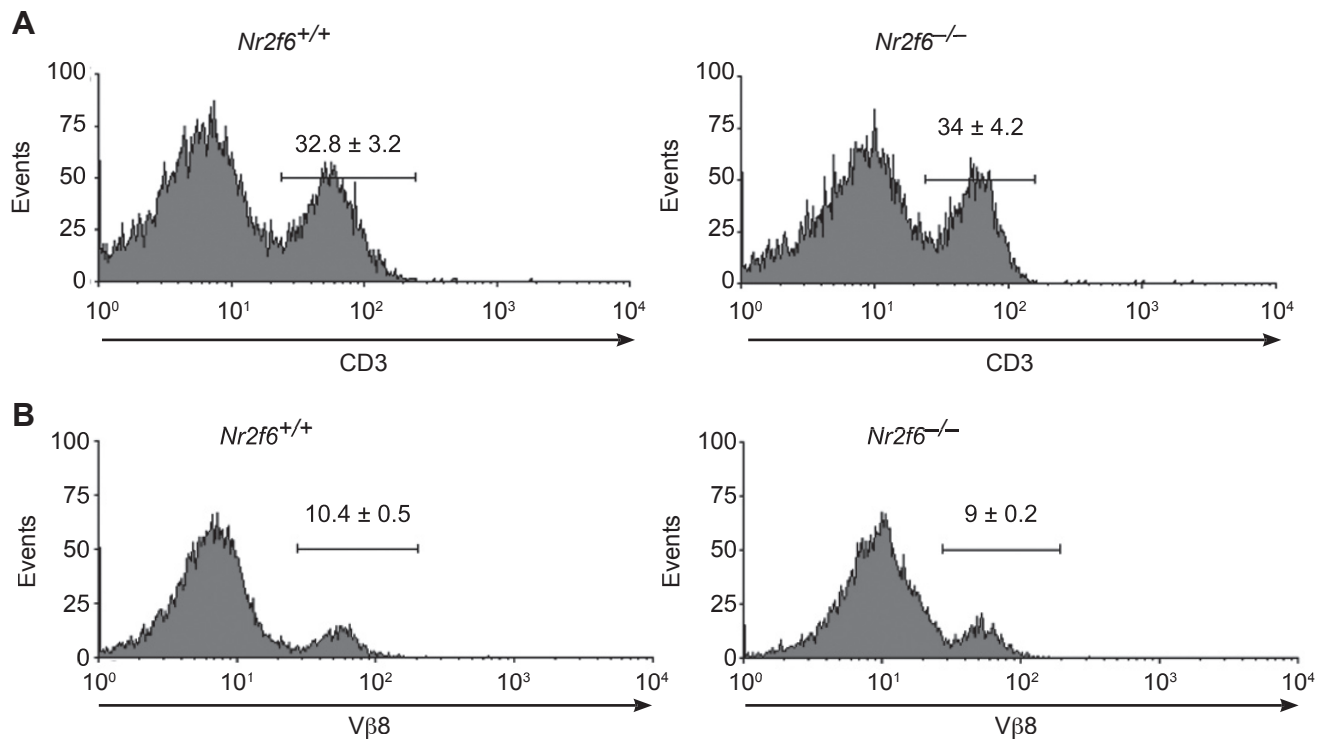

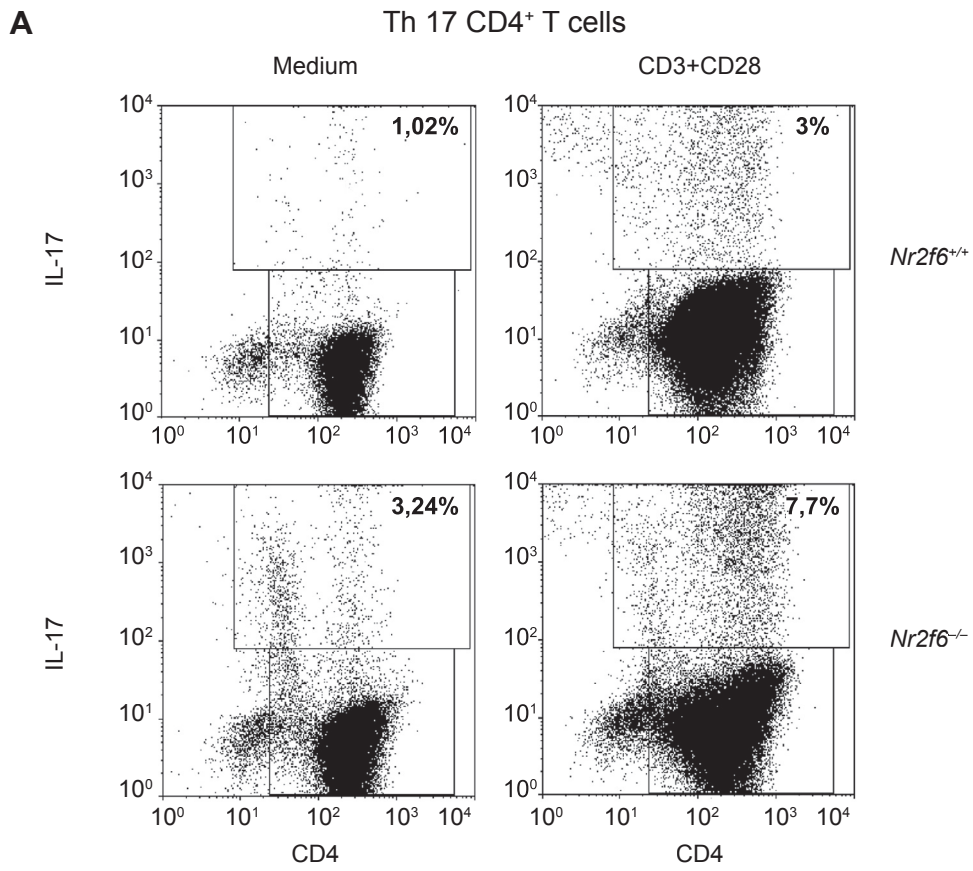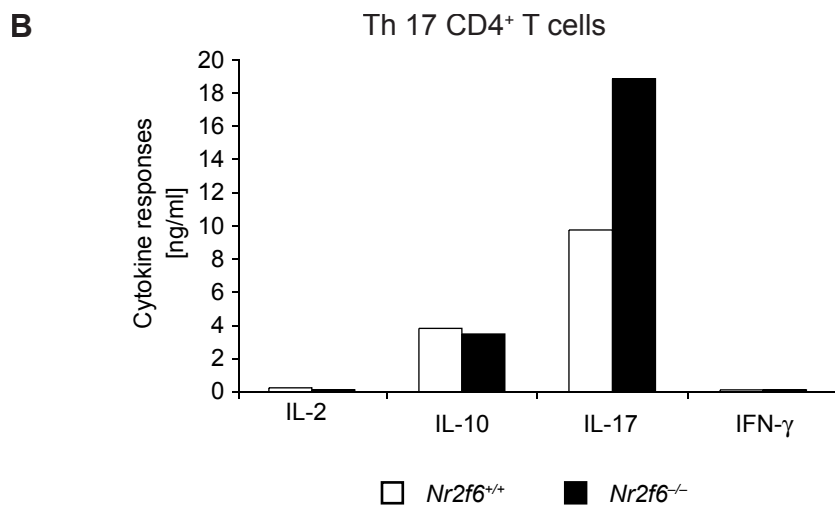

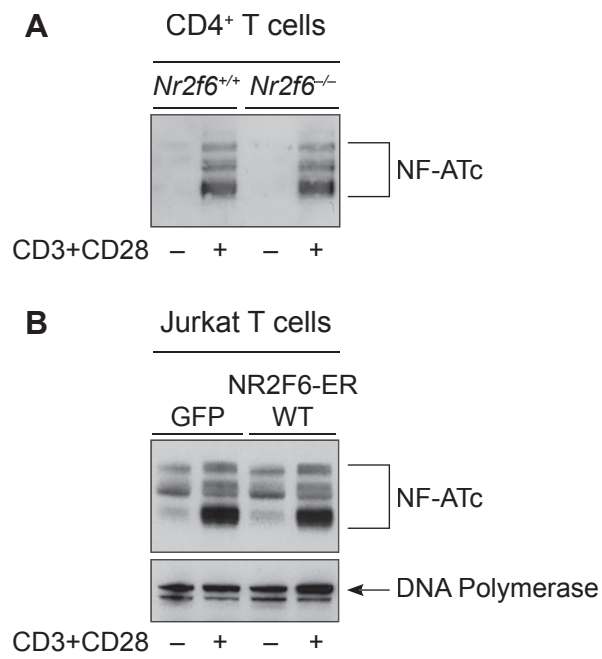

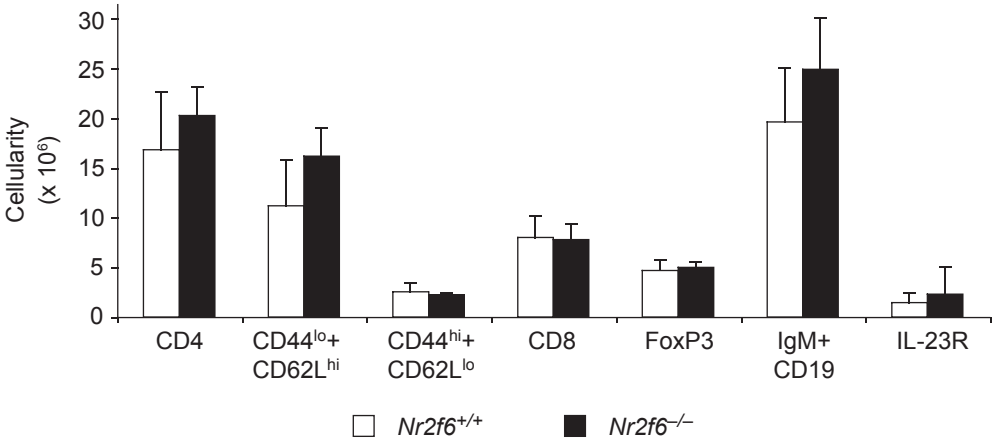

Supplement: NIHMS31334-supplement-Supplemental_Experimental_Procedures_and_Sixteen_Figures_.pdf [file NIHMS31334-supplement-Supplemental_Experimental_Procedures_and_Sixteen_Figures_.pdf]
